# Supplementary material for: Cofactor engineering through heterologous expression of an NADH oxidase and its impact on metabolic flux redistribution in Klebsiella pneumoniae
Source: PubMed Central journal article supplement (PMC3563507; doi:10.1186/1754-6834-6-7), 2013-01-25
Supplement: 1754-6834-6-7-S1.pdf [file 1754-6834-6-7-S1.pdf]

## Additional file 1-Metabolic pathways of acetoin and 2,3-butanediol in the bacteria

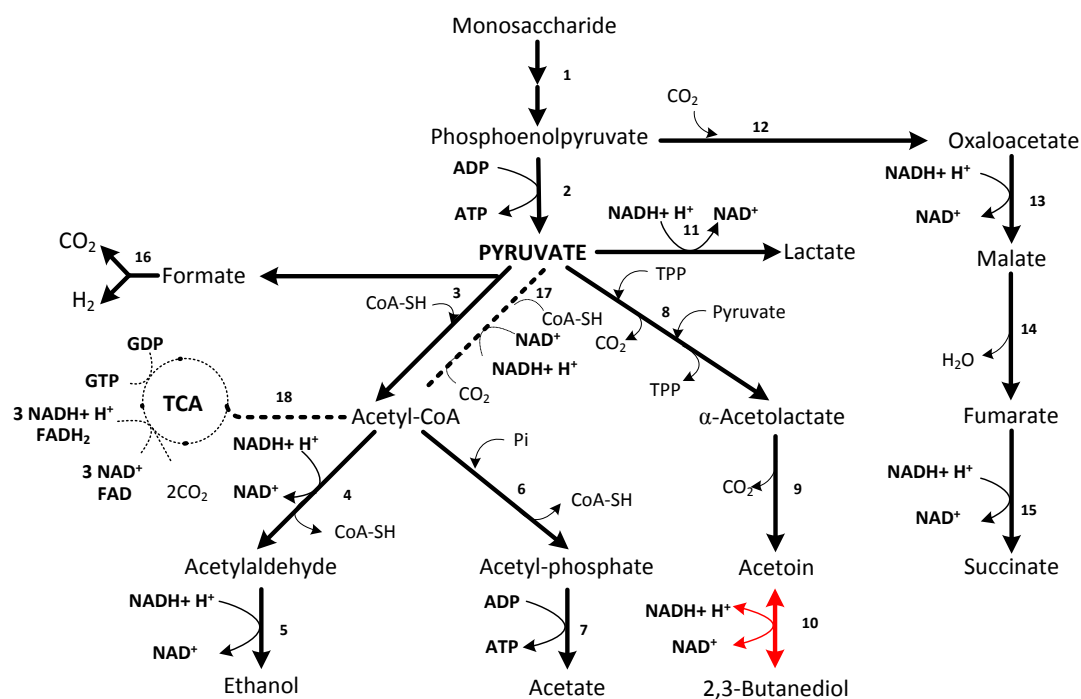

**Figure S1.** Mixed acid-2,3-butanediol pathway (dashed lines represent the pathways that are active only under the aerobic conditions). TCA: tricarboxylic acids cycle, Enzymes: 1, enzymes of glycolysis (and pentose phosphate pathway); 2, pyruvate kinase; 3, pyruvate-formate lyase; 4, acetaldehyde dehydrogenase; 5, ethanol dehydrogenase; 6, phospho-transacetylase; 7, acetate kinase; 8, acetolactate synthase; 9, acetolactate decarboxylase; 10, acetoin reductase (2,3-butanediol dehydrogenase); 11, lactate dehydrogenase; 12, phosphoenolpyruvate decarboxylase; 13, malate dehydrogenase; 14, fumarase; 15, succinate dehydrogenase; 16, formate-hydrogen lyase; 17, pyruvate dehydrogenase multienzyme complex; and 18, citroyl synthetase.
