# Supplementary material for: Cofactor engineering through heterologous expression of an NADH oxidase and its impact on metabolic flux redistribution in Klebsiella pneumoniae
Source: PubMed Central journal article supplement (PMC3563507; doi:10.1186/1754-6834-6-7), 2013-01-25
Supplement: 1754-6834-6-7-S3.pdf [file 1754-6834-6-7-S3.pdf]

**Additional file 3-The intracellular oxidation-reduction level was affected by expressing heterologous NADH oxidase in *Klebsiella pneumoniae* in the fed-batch fermentation**

Heterologous expression of NADH oxidase in *K. pneumoniae* led to a lower level of NADH pool and a higher level of NAD<sup>+</sup> pool compared with the parent strain during the fed-batch fermentation process. The difference of the NADH/NAD<sup>+</sup> ratio between the parent and the recombinant strain was thus observed.

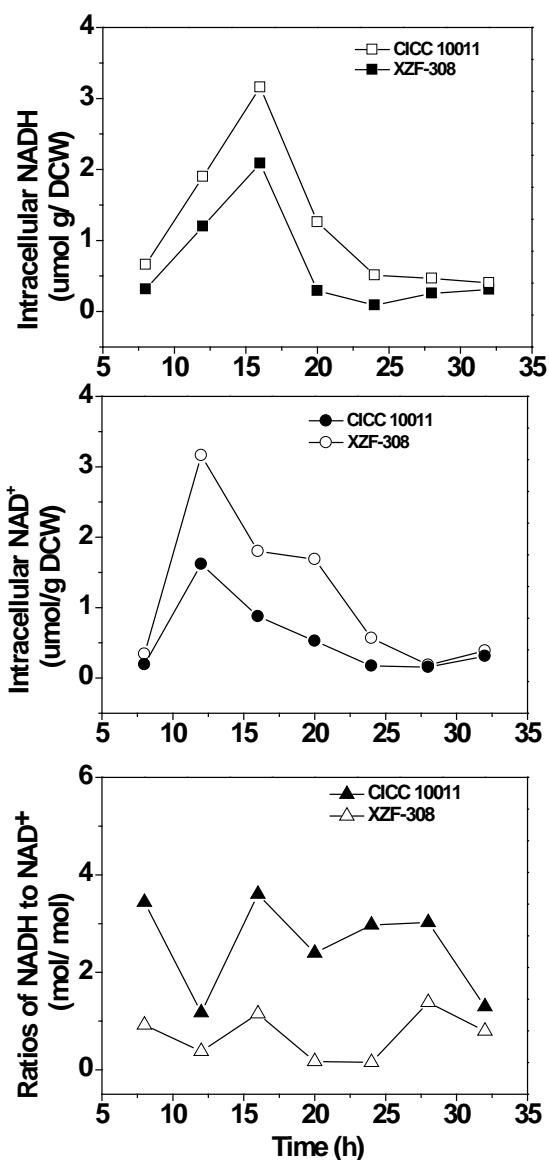

**Figure S3.** Effects of the NAD<sup>+</sup> regeneration system introduced into *K. pneumoniae* on the concentrations of intracellular NADH, NAD<sup>+</sup>, and NADH/NAD<sup>+</sup> ratio in fed-batch fermentation. CICC 10011: the parent strain; XZF-308: the recombinant strain.
